# Supplementary material
Source: PubMed Central journal article supplement (PMC6870364)
Supplement: HBM-34-1133-s001.pdf [file HBM-34-1133-s001.pdf]

Decoding abstract and concrete concept representations based on single-trial fMRI data

Jing Wang, Laura B. Baucom, Svetlana V. Shinkareva

Supplementary Materials

Tabel S1 List of triplets. Each row is a triplet, and each block of six triplets is one repetition of an exemplar.

|                     |            |            |            |
|---------------------|------------|------------|------------|
| Abstract, Cognition | error      | mistake    | blunder    |
|                     | error      | slipup     | mistake    |
|                     | mistake    | error      | blunder    |
|                     | mistake    | slipup     | error      |
|                     | blunder    | error      | mistake    |
|                     | slipup     | mistake    | error      |
|                     | concept    | reflection | notion     |
|                     | cogitation | notion     | reflection |
|                     | reflection | cogitation | concept    |
|                     | notion     | concept    | cogitation |
|                     | concept    | cogitation | notion     |
|                     | notion     | reflection | cogitation |
|                     | opinion    | contention | conviction |
|                     | belief     | conviction | contention |
|                     | conviction | belief     | opinion    |
|                     | contention | opinion    | belief     |
|                     | contention | opinion    | conviction |
|                     | opinion    | contention | belief     |
| dream               | delusion   | fantasy    |            |
| delusion            | fantasy    | dream      |            |
| dream               | illusion   | delusion   |            |
| dream               | fantasy    | illusion   |            |
| fantasy             | illusion   | dream      |            |
| illusion            | dream      | fantasy    |            |
| Abstract, Emotion   | mercy      | empathy    | sympathy   |
|                     | mercy      | sympathy   | pity       |
|                     | sympathy   | pity       | empathy    |
|                     | pity       | mercy      | sympathy   |
|                     | empathy    | sympathy   | mercy      |
|                     | pity       | empathy    | sympathy   |

Concrete, Tools

|             |             |             |
|-------------|-------------|-------------|
| happiness   | enjoyment   | pleasure    |
| happiness   | delight     | enjoyment   |
| pleasure    | happiness   | delight     |
| delight     | enjoyment   | pleasure    |
| pleasure    | delight     | enjoyment   |
| happiness   | pleasure    | delight     |
| sadness     | distress    | depression  |
| gloom       | depression  | distress    |
| distress    | sadness     | depression  |
| depression  | gloom       | sadness     |
| gloom       | sadness     | distress    |
| distress    | gloom       | sadness     |
| dread       | fright      | trepidation |
| horror      | dread       | fright      |
| trepidation | fright      | dread       |
| fright      | dread       | trepidation |
| dread       | trepidation | horror      |
| dread       | horror      | fright      |
| knife       | razorblade  | scalpel     |
| scalpel     | cutlass     | razorblade  |
| knife       | razorblade  | cutlass     |
| razorblade  | knife       | scalpel     |
| razorblade  | scalpel     | knife       |
| scalpel     | knife       | razorblade  |
| hammer      | club        | hatchet     |
| hammer      | mallet      | hatchet     |
| club        | hatchet     | mallet      |
| club        | hammer      | hatchet     |
| mallet      | club        | hammer      |
| hatchet     | hammer      | club        |
| paintbrush  | highlighter | pencil      |
| marker      | pencil      | highlighter |
| paintbrush  | marker      | highlighter |
| paintbrush  | pencil      | marker      |
| pencil      | marker      | paintbrush  |
| pencil      | paintbrush  | marker      |
| spatula     | fork        | tablespoon  |
| chopsticks  | tablespoon  | fork        |
| fork        | chopsticks  | spatula     |
| tablespoon  | fork        | chopsticks  |
| chopsticks  | spatula     | tablespoon  |
| fork        | tablespoon  | chopsticks  |

|                     |             |             |             |
|---------------------|-------------|-------------|-------------|
| Concrete, Dwellings | house       | apartment   | flat        |
|                     | house       | condominium | flat        |
|                     | house       | flat        | condominium |
|                     | apartment   | condominium | flat        |
|                     | flat        | condominium | apartment   |
|                     | condominium | apartment   | flat        |
|                     | <hr/>       |             |             |
|                     | palace      | penthouse   | castle      |
|                     | mansion     | castle      | penthouse   |
|                     | castle      | palace      | mansion     |
|                     | penthouse   | mansion     | palace      |
|                     | palace      | mansion     | penthouse   |
|                     | penthouse   | castle      | palace      |
|                     | <hr/>       |             |             |
|                     | stadium     | pavilion    | coliseum    |
|                     | pavilion    | coliseum    | stadium     |
|                     | theatre     | stadium     | coliseum    |
|                     | theatre     | coliseum    | pavilion    |
|                     | theatre     | pavilion    | stadium     |
|                     | coliseum    | stadium     | pavilion    |
|                     | <hr/>       |             |             |
|                     | silos       | barn        | shed        |
|                     | silos       | shed        | warehouse   |
|                     | barn        | silos       | shed        |
|                     | shed        | warehouse   | barn        |
|                     | warehouse   | barn        | silos       |
|                     | warehouse   | shed        | barn        |

*Logistic regression classifier*

Logistic regression estimates the likelihood  $P(Y/X)$  of each label  $Y$  from the voxel values  $X = \{x_{i1}, \dots, x_{iV}\}$  using the model

$$P(Y = 1|X) = \frac{1}{1 + \exp(w_0 + \sum_{i=1}^V w_i x_i)}$$

Where  $W = \{w_1, w_2, \dots, w_V\}$  are the weights (Bishop 2006).

Reference

Bishop CM. 2006. Pattern recognition and machine learning. New York: Springer.
